# Supplementary material for: Assessing the need for pioglitazone in the treatment of patients with type 2 diabetes: a meta-analysis of its risks and benefits from prospective trials
Source: PubMed Central journal article supplement (PMC7519682; doi:10.1038/s41598-020-72967-8), 2020-09-25

## **TITLE PAGE**

### **Assessing the need for pioglitazone in the treatment of patients with type 2 diabetes: A meta-analysis of its risks and benefits from prospective trials**

Binayak Sinha<sup>1</sup> & Samit Ghosal<sup>2</sup>

1. Consultant Endocrinologist: AMRI Hospitals KB 24, KB Block, Sector III, Bidhannagar, Kolkata 700098. India.

2. Consultant Endocrinologist: Nightingale Hospital. 11 Shakespeare Sarani. Kolkata 700071. India.

Corresponding author: Samit Ghosal.

E-mail address: [ramdasghosal@gmail.com](mailto:ramdasghosal@gmail.com)

Supplementary Table 1: Assessment of quality of evidence for the outcomes analyzed using the GRADE system

| Outcomes of interest    | Trials, n | Effect size: MH-OR; (95% CI) | P-value | I <sup>2</sup> | Grading of Recommendations, Assessment, Development, and Evaluation |
|-------------------------|-----------|------------------------------|---------|----------------|---------------------------------------------------------------------|
| MACE                    | 5         | 0.86; (0.75–0.98)            | 0.03    | 0.000          | ⊕⊕⊕⊕                                                                |
| MI                      | 5         | 0.85; (0.68–1.06)            | 0.14    | 0.000          | ⊕⊕⊕⊖                                                                |
| Stroke                  | 5         | 0.77; (0.60–0.99)            | 0.04    | 0.000          | ⊕⊕⊕⊖                                                                |
| CV death                | 3         | 0.88; (0.35–2.24)            | 0.79    | 5.51           | ⊕⊕⊕⊖                                                                |
| ACM                     | 6         | 0.94; (0.76–1.16)            | 0.58    | 0.000          | ⊕⊕⊕⊕                                                                |
| Nephropathy progression | 3         | 0.95; (0.74–1.21)            | 0.68    | 75.65          | ⊕⊕⊕⊖                                                                |
| hHF                     | 5         | 1.47; (1.26–1.71)            | <0.001  | <0.001         | ⊕⊕⊕⊖                                                                |
| HF                      | 3         | 1.48; (1.21–1.81)            | <0.001  | <0.001         | ⊕⊕⊖                                                                 |
| Cancer                  | 3         | 1.02; (0.83-1.25)            | 0.86    | 0.000          | ⊕⊕⊖⊖                                                                |
| Fracture                | 4         | 1.31; (0.98-1.76)            | 0.06    | 22.77          | ⊕⊕⊖⊖                                                                |
| Macular edema           | 1         | 2.28; (0.59-8.82)            | 0.23    | NA             | ⊕⊖⊖⊖                                                                |
| Anaemia                 | 2         | 2.56; (1.56-4.20)            | <0.001  | 24.83          | ⊕⊖⊖⊖                                                                |
| Drug discontinuation    | 3         | 1.09; (0.89-1.34)            | 0.38    | 10.59          | ⊕⊖⊖⊖                                                                |

## Supplementary figure 1: Web search strategy

Search Name: Pio: Cochrane Library (Access provided by Royal College of Physicians)

Date Run: 12/08/2018 17:43:52

Comment:

| ID  | Search                                                                            | Hits   |
|-----|-----------------------------------------------------------------------------------|--------|
| #1  | MeSH descriptor: [Diabetes Mellitus, Type 2] explode all trees                    | 17440  |
| #2  | MeSH descriptor: [Thiazolidinediones] explode all trees                           | 1811   |
| #3  | MeSH descriptor: [Pioglitazone] explode all trees                                 | 1053   |
| #4  | #2 OR #3                                                                          | 1811   |
| #5  | #1 OR #2 OR #3 in Trials                                                          | 18087  |
| #6  | #1 AND #4                                                                         | 1083   |
| #7  | (major adverse cardiac events):ti,ab,kw (Word variations have been searched)      | 5899   |
| #8  | (MACE):ti,ab,kw (Word variations have been searched)                              | 2957   |
| #9  | (myocardial infarction):ti,ab,kw (Word variations have been searched)             | 30757  |
| #10 | (stroke):ti,ab,kw (Word variations have been searched)                            | 54538  |
| #11 | (cardiovascular death):ti,ab,kw (Word variations have been searched)              | 12329  |
| #12 | (all-cause mortality):ti,ab,kw (Word variations have been searched)               | 9388   |
| #13 | (heart failure):ti,ab,kw (Word variations have been searched)                     | 35467  |
| #14 | (hospitalization for heart failure):ti,ab,kw (Word variations have been searched) | 10194  |
| #15 | (microvascular outcomes):ti,ab,kw (Word variations have been searched)            | 1384   |
| #16 | #7 OR #8 OR #9 OR #10 OR #11 OR #12 OR #13 OR #14 OR #15                          | 113261 |
| #17 | #16 AND #5                                                                        | 1410   |
| #18 | #16 AND #6                                                                        | 127    |

Supplementary Figure 2: Quality of selected studies using the Cochrane risk of bias algorithm

|                                    |   |   |   |   |   |   |   |
|------------------------------------|---|---|---|---|---|---|---|
| PROactive <sup>11</sup><br>2005    | + | + | + | + | + | + | + |
| TOSCA.IT <sup>12</sup><br>2017     | + | + | + | + | + | + | + |
| PROFIT-J <sup>13</sup><br>2014     | ? | ? | - | - | + | + | + |
| Kaku et al <sup>14</sup><br>2009   | ? | ? | - | + | + | ? | + |
| J-SPIRIT <sup>15</sup><br>2017     | ? | ? | - | ? | + | ? | ? |
| Lee et al <sup>16</sup><br>2013    | ? | ? | ? | ? | + | ? | ? |
| PERISCOPE <sup>7</sup><br>2008     | + | + | + | + | + | + | + |
| Kaneda et al <sup>17</sup><br>2009 | ? | ? | + | - | + | ? | + |
| Giles et al <sup>26</sup><br>2008  | ? | + | ? | ? | + | - | ? |
| Giles et al <sup>27</sup><br>2010  | ? | ? | + | ? | + | ? | ? |

Random sequence generation

Allocation concealment

Blinding of participants and personnel

Blinding of outcome assessment

Incomplete outcome data

Selective reporting

Other bias

|                        |
|------------------------|
| + Low risk of bias     |
| -High risk of bias     |
| ? Unclear risk of bias |

Supplementary figure 3: Funnel plots assessing publication bias (a) MACE, (b) Stroke, (c) Fracture risk, and (d) hHF.

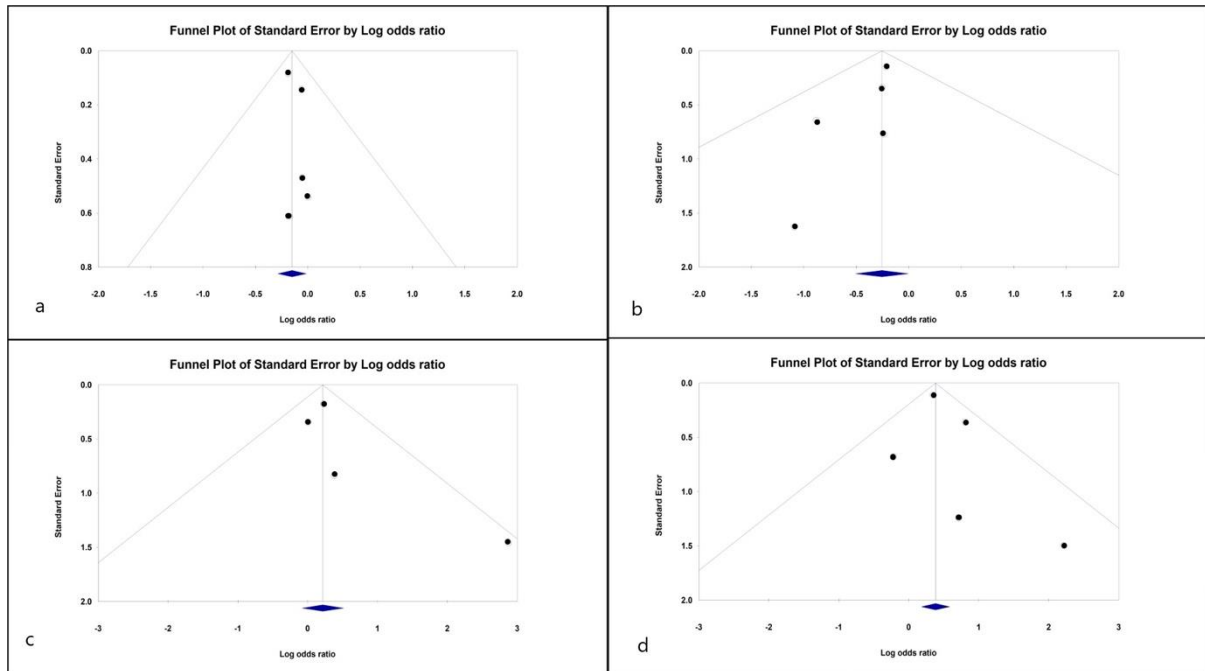

Supplementary Figure 4: Sensitivity analysis comparing Pioglitazone versus non-active control on (a). MACE, (b). Stroke, and (c). hHF.

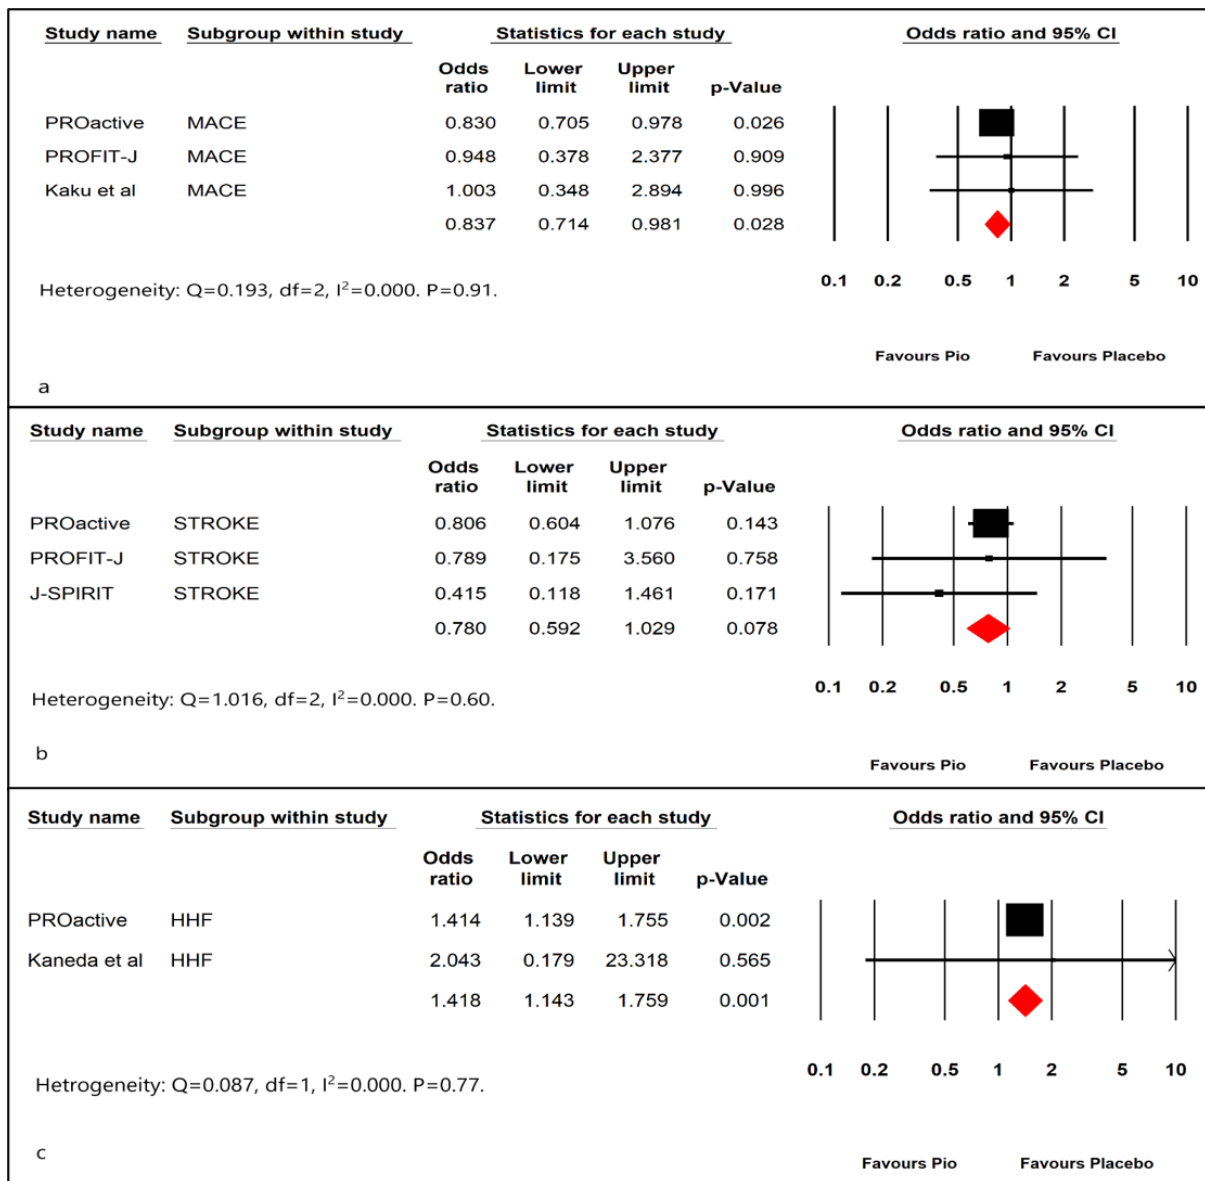

Supplement: 41598_2020_72967_MOESM1_ESM.pdf [file 41598_2020_72967_MOESM1_ESM.pdf]
